# Supplementary material
Source: PubMed Central journal article supplement (PMC3047789)
Supplement: self0103_0259SD1.pdf [file self0103_0259SD1.pdf]

## Supplemental Fig. 1

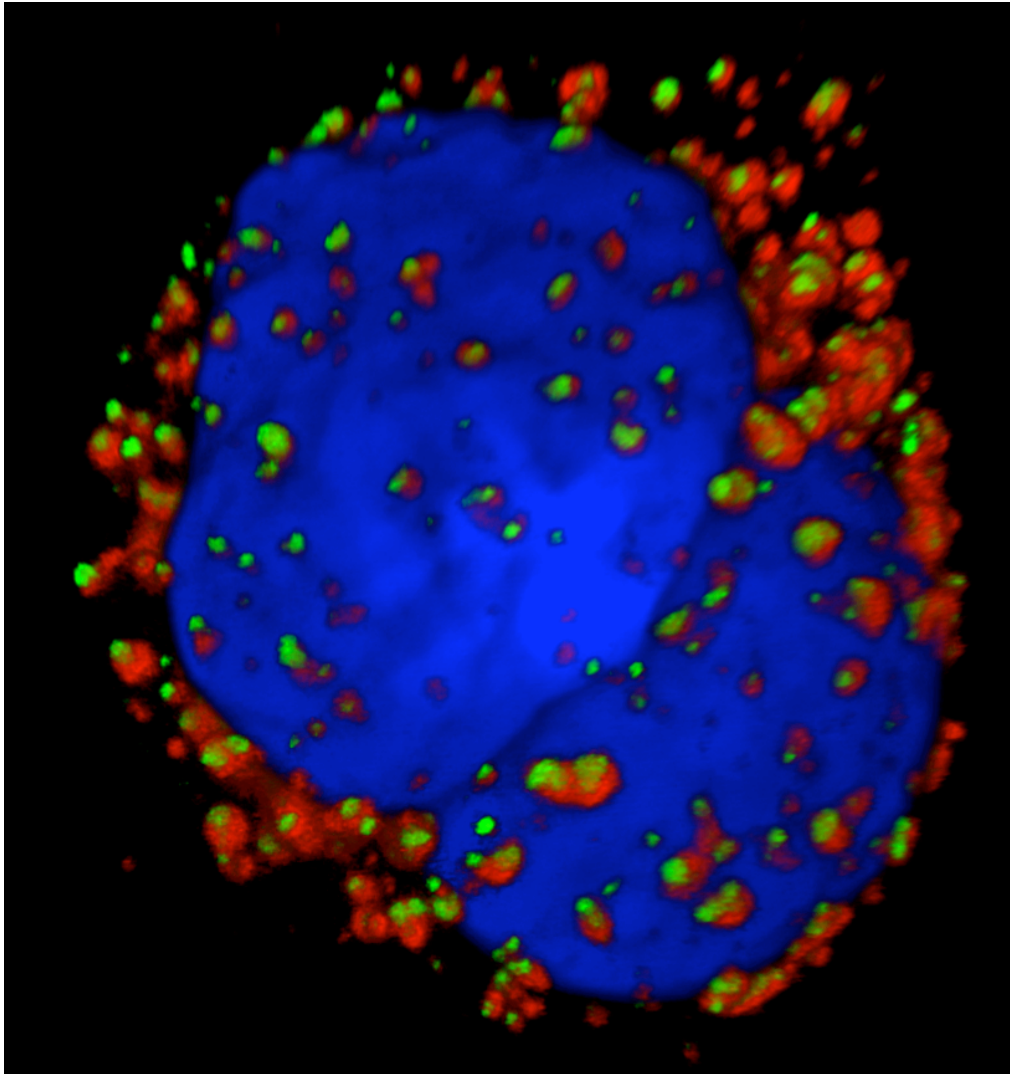

Intracellular co-localization of myc-huGIMAP5 and the lysosome marker cathepsin D. 3D image of a dividing, tetracycline-induced myc-huGIMAP5 TReX™ Jurkat T cell stained against the myc epitope (red) and cathepsin D (green), and nuclei were counterstained with DAPI (blue). Cells were treated with tetracycline for 24hrs in culture to induce GIMAP5 expression and were imaged on a Zeiss LSM510 confocal microscope. A 3D model of the cell was generated using Volocity software (Perkin Elmer). A direct opacity renderer was applied to the raw confocal image data with the density set high, creating the appearance of solid objects in the rendered image.

## SUPPLEMENTARY TABLES

Supplemental Table 1: Details of anti-GIMAP monoclonal antibodies developed ‘in-house’ and used in this study.

| GIMAP#  | mAb name            | Isotype          | Strain | Fusion partner         | Immunogen: GST fusion with:- | Vector/Bacteria    | Immunogen form       |
|---------|---------------------|------------------|--------|------------------------|------------------------------|--------------------|----------------------|
| mGIMAP1 | MAC420 <sup>1</sup> | Rat $\gamma$ 2a  | LOU/C  | Y3Ag1.2.3 <sup>2</sup> | mGIMAP1aa1-238               | pDEST15/RosettaDE3 | Soluble/gel-purified |
| mGIMAP5 | MAC421              | Rat $\gamma$ 2a  | LEW    | Y3Ag1.2.3              | mGIMAP5aa1-270               | pDEST15/RosettaDE3 | Soluble              |
| hGIMAP5 | MAC428              | Rat $\gamma$ 1   | LOU/C  | IR983F <sup>3</sup>    | hGIMAP5aa1-211               | pGEX.4T1/Rosetta   | Inclusion bodies     |
| hGIMAP5 | MAC429              | Rat $\gamma$ 1   | LOU/C  | Y3Ag1.2.3              | hGIMAP5aa1-211               | pGEX.4T1/Rosetta   | Inclusion bodies     |
| rGIMAP5 | MAC427              | Mouse $\gamma$ 1 | BALB/c | NS0 <sup>4</sup>       | rGIMAP5aa1-276               | pGEX.4T1/Rosetta   | Inclusion bodies     |

1. See suppl. ref. 1.
2. See suppl. Ref.2.
3. See suppl. Ref. 3
4. See suppl. Ref. 4.

Supplemental Table 2: Externally-acquired antibodies and other marker reagents used in this study

(A) Antibodies used for western blotting.

| Primary Antibody           | Clone                | Source                                      |
|----------------------------|----------------------|---------------------------------------------|
| Rat anti-mGIMAP1           | MAC420               | See Suppl. Table 1                          |
| Rat anti-mGIMAP5           | MAC421               | See Suppl. Table 1                          |
| Rat anti-hGIMAP5           | MAC428, MAC429       | See Suppl. Table 1                          |
| Mouse anti-rGIMAP5         | MAC427               | See Suppl. Table 1                          |
| Mouse anti-myc             | 9E10                 | Prepared in-house (courtesy of Dr. S. Cook) |
| Mouse anti- $\beta$ -actin | AC-15, ascitic fluid | Sigma                                       |
| Mouse anti-HA              | 12CA5                | Prepared in-house (courtesy of Dr. S. Cook) |
| Rabbit anti-VDAC-1/Porin   | polyclonal           | Calbiochem (PC548T)                         |
| Mouse anti-Hsp90           | 68                   | BD Biosciences                              |
| Rabbit anti-TAP1 (D90)     | polyclonal           | See suppl. ref. 5                           |
| Mouse anti-GM130           | 35                   | BD Transduction Laboratories                |
| Rabbit anti-TGN38          | polyclonal           | Abcam (ab16059)                             |
| Rabbit anti-calnexin       | C4731                | Sigma                                       |
| Rat anti-LAMP1             | 1D4B                 | Courtesy of Dr G. Griffiths                 |
| Rat anti-LAMP2             | ABL-93               | Grown in-house from hybridoma               |
| Mouse anti-hLAMP2          | H4B4                 | Santa Cruz Biotech (sc-18822)               |

| Secondary Antibody       | Clone | Source                 |
|--------------------------|-------|------------------------|
| Goat anti-rat IgG HRP    |       | Jackson ImmunoResearch |
| Goat anti-mouse IgG HRP  |       | Sigma A4416            |
| Goat anti-rabbit IgG HRP |       | DAKO Cytomation        |

(B) Antibodies used for immunocytochemistry.

| Primary Antibody              | Conjugation | Clone/cat. No.                          | Source                                      |
|-------------------------------|-------------|-----------------------------------------|---------------------------------------------|
| rat anti-mGIMAP1              |             | MAC420                                  | See Suppl. Table 1                          |
| rat anti-hGIMAP5              |             | MAC428, MAC429                          | See Suppl. Table 1                          |
| mouse anti-myc                |             | 9E10                                    | Prepared in-house (courtesy of Dr. S. Cook) |
| rabbit anti-calnexin          |             | C4731                                   | Sigma                                       |
| rabbit anti-giantin           |             | 24586                                   | AbCam                                       |
| mouse anti-GM130              |             | 35                                      | BD Transduction Laboratories                |
| mouse anti-cytochrome c       |             | 6H2                                     | Santa Cruz Biotech                          |
| mouse anti- $\gamma$ -tubulin |             | GTU-88, ascitic fluid                   | Sigma                                       |
| rabbit anti-cathepsin D       |             | Protein A-purified polyclonal antiserum | Upstate Biotech (06-467)                    |

|                   |  |      |                               |
|-------------------|--|------|-------------------------------|
| mouse anti-hLAMP2 |  | H4B4 | Santa Cruz Biotech (sc-18822) |
|-------------------|--|------|-------------------------------|

| Secondary antibodies             | Conjugation     | Clone/cat. No. | Source                      |
|----------------------------------|-----------------|----------------|-----------------------------|
| goat anti-rat IgG                | Alexa Fluor 568 | A11077         | Invitrogen Molecular Probes |
| goat anti-rabbit IgG             | Alexa Fluor 488 | A11008         | Invitrogen Molecular Probes |
| goat anti-mouse IgG <sub>1</sub> | Alexa Fluor 488 | A11001         | Invitrogen Molecular Probes |

#### Supplementary references

- (1) Saunders, A., Lamb, T., Pascall J., Hutchings A., Dion C., Carter C., Hepburn L., Langhorne J. & Butcher, G.W. (2009) Expression of GIMAP1, a GTPase of the immunity-associated protein family, is not up-regulated in malaria. *Malaria Journal* **8**:53.
- (2) Galfrè G., Milstein, C. & Wright, B. (1979) Rat x rat hybrid myelomas and a monoclonal anti-Fd portion of mouse IgG. *Nature* **277**:131.
- (3) Bazin H. (1982) In: *Protides of the Biological Fluids 29<sup>th</sup> Colloquium 1981*, ed. H. Peeters. Pergamon Press.
- (4) Galfrè G. & Milstein, C. (1981) In: *Methods in Enzymology* vol. 73, part B, eds. J.J.Langone & H. Van Vunakis, pp. 3-46. New York: Academic Press.
- (5) Powis, S.J., Townsend, A.R.M., Deverson, E.V., Bastin, J., Butcher, G.W. and Howard, J.C. (1991) Restoration of antigen presentation to the mutant cell line RMA-S by an MHC-linked transporter. *Nature* **354**:528.
